# Supplementary material
Source: PubMed Central journal article supplement (PMC4592830)
Supplement: NIHMS718109-supplement-1.pdf [file NIHMS718109-supplement-1.pdf]

**A** Targeted *I17rb* allele

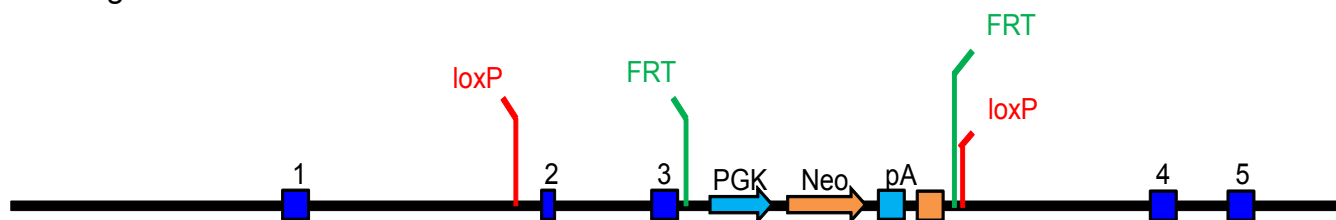

**B** CD11c<sup>+</sup> lung cells  
CD11c ΔCIKS

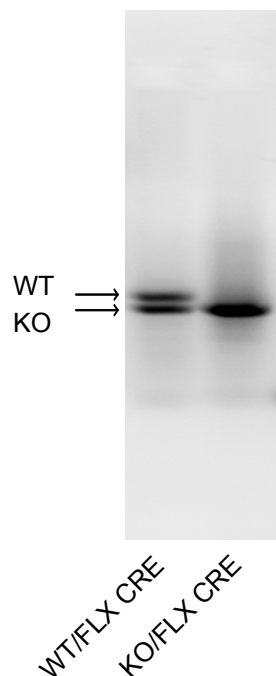

**C** CD11c<sup>+</sup> spleen cells  
CD11c ΔCIKS

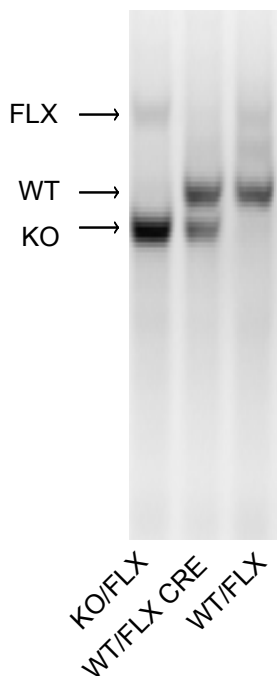

**D** CD11c<sup>+</sup> lung cells  
CD11c ΔRB

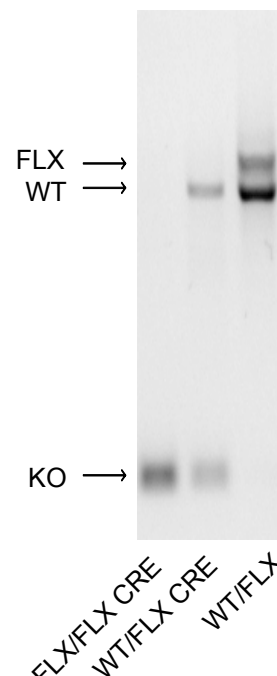

Supplemental Figure 1: Generation of a floxed *I17rb* allele and efficient CD11c-Cre mediated deletion of floxed *Ciks* (*Traf3ip2*) and floxed *I17rb* alleles. (A) Genomic organization of the targeted (recombined) *I17rb* allele. Construction of the targeting vector, recombination in C57BL/6 ES cells and generation of mice with germline transmission were performed by Ozgene (Australia). The FRT cassette was deleted in germline via introduction (crossing of lines) of an Actin-driven FLPe recombinase transgene, which was subsequently bred out. This resulted in mice carrying a floxed (loxP flanked exons 2+3) *I17rbflx* allele lacking the FRT cassette. A complete germline knockout (KO) allele was also generated by introduction of an Ella-driven Cre recombinase transgene, which was subsequently bred out. Appropriate crosses allowed for generation of mice with *WT*, *I17rbflx* and/or *I17rb*- (KO) alleles, along with or without a transgene encoding a CD11c-driven Cre recombinase. (B-D) Sorted CD11c<sup>+</sup> cells from lungs or spleen (as indicated) were genotyped with PCR to demonstrate efficient CD11c-Cre mediated deletion of floxed *Ciks* (B,C) and floxed *I17rb* (D) alleles.

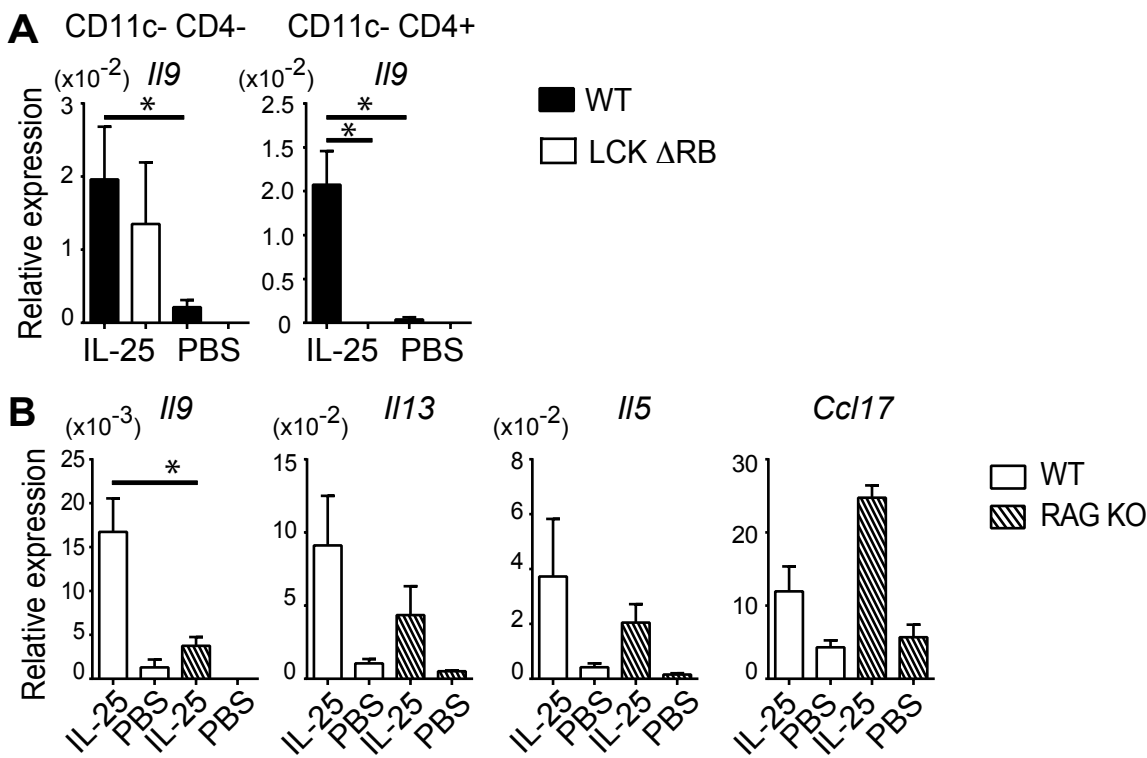

**Supplemental Figure 2:** (A) Expression of *Il9* in lung cell populations indicated from WT and Lck  $\Delta$  RB mice, 24h after a single challenge with IL-25 or PBS. (B) Relative expression of *Ccl17*, *Il9*, *Il13* and *Il5* in total lung of wild-type (WT) and RAG KO mice 24h after three daily challenges with IL-25 or PBS. (A,B) Data shown as mean  $\pm$  sem, based on three independent experiments, each with cells pooled from 3-4 mice/genotype/condition. \*  $p < 0.05$ .

**(C) Antibodies used for FACS analysis (from BD Bioscience, ebioscience, Biolegend)**

| Antibody         | Clone | Fluorochrome | Antibody | Clone      | Fluorochrome |
|------------------|-------|--------------|----------|------------|--------------|
| FcR $\epsilon$ I | MAR1  | APC          | CD3      | 145-2C11   | PB           |
| Cd117            | c-kit | PE           | CD25     | PC61       | APC          |
| Cd49b            | DX-5  | PE-Cy7       | TCRb     | H57-787    | PB           |
| CD278            | ICOS  | FITC         | CD44     | IM7        | PE-Cy5       |
| CD11c            | HL3   | APC          | IL-9     | RM9a       | PE           |
| CD103            | 2E7   | PE           | IL-13    | Ebio13A    | APC          |
| CD11b            | Mac1  | PercP        | IL-17    | TCII-18H10 | FITC         |
| CD4              | GK1.5 | APC-Cy7      |          |            |              |
